# Supplementary material
Source: MDPI journal article supplement (https://www.mdpi.com/2073-4344/8/9/348)
Supplement: s1 [file s1]

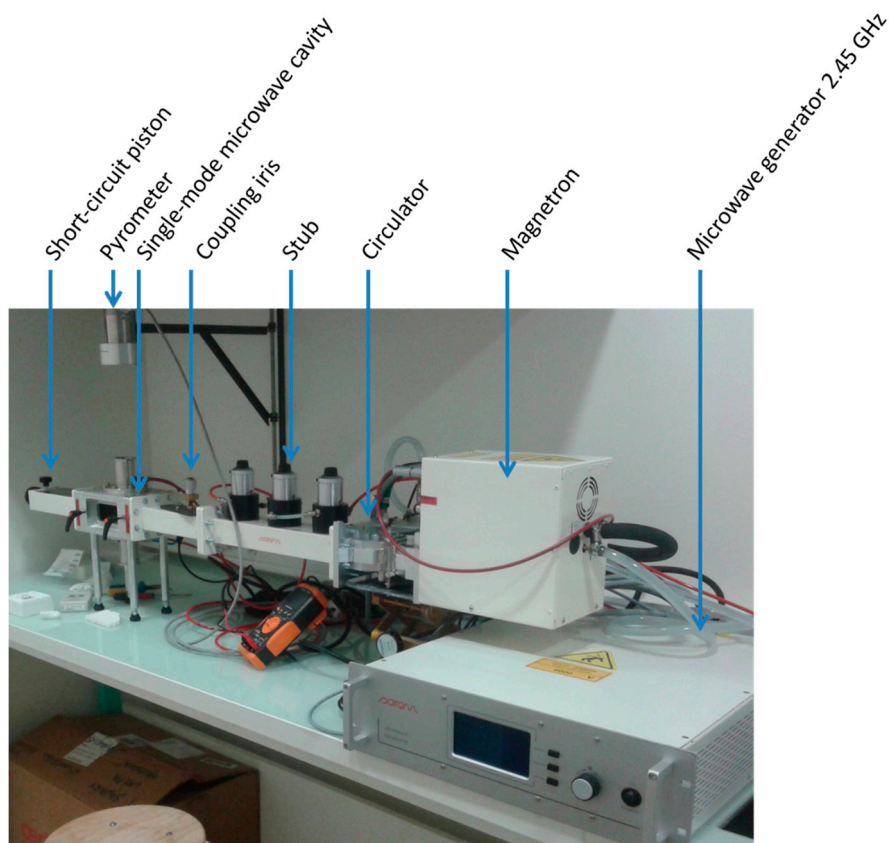

**Figure S1.** Description of the single-mode microwave apparatus (Sairem).

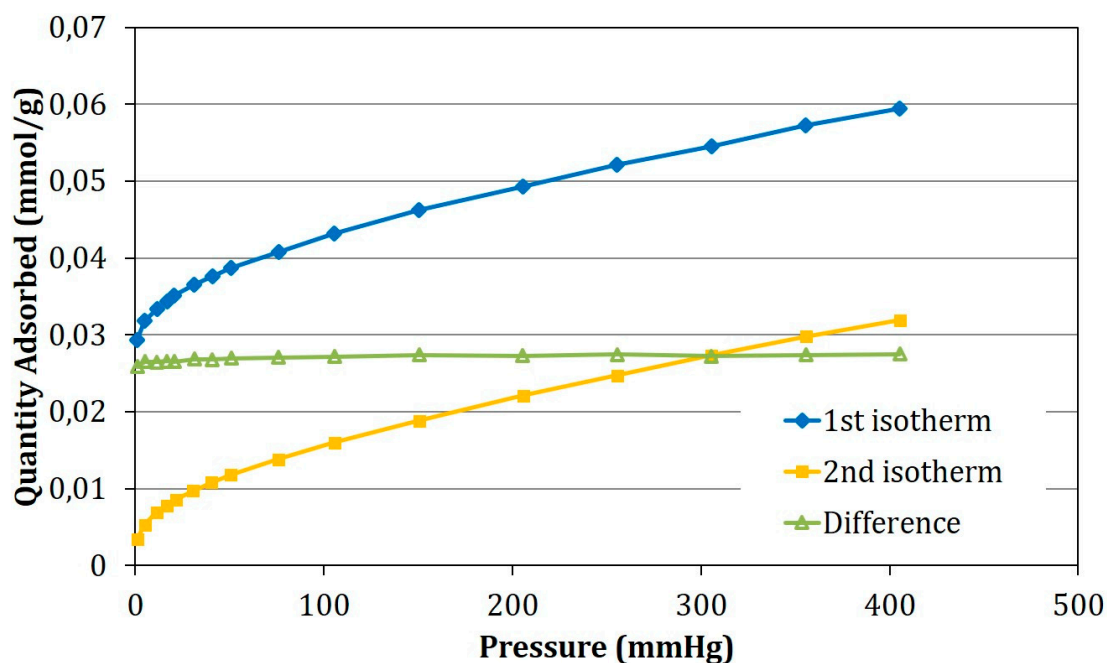

**Figure S2.** Example of a typical CO adsorption isotherm: 1st isotherm corresponds to both physisorbed and chemisorbed CO, 2nd isotherm, measured after evacuation, corresponds to physisorbed CO and the difference corresponds, therefore, to the amount of chemisorbed CO.
